# Supplementary material for: Integrative Transcriptomic, Proteomic and Functional Analysis Reveals ATP1B3 as a Diagnostic and Potential Therapeutic Target in Hepatocellular Carcinoma
Source: Frontiers journal article supplement (doi:10.3389/fimmu.2021.636614), 2021-04-02
Supplement: Data_Sheet_1.docx [file Data_Sheet_1.docx]

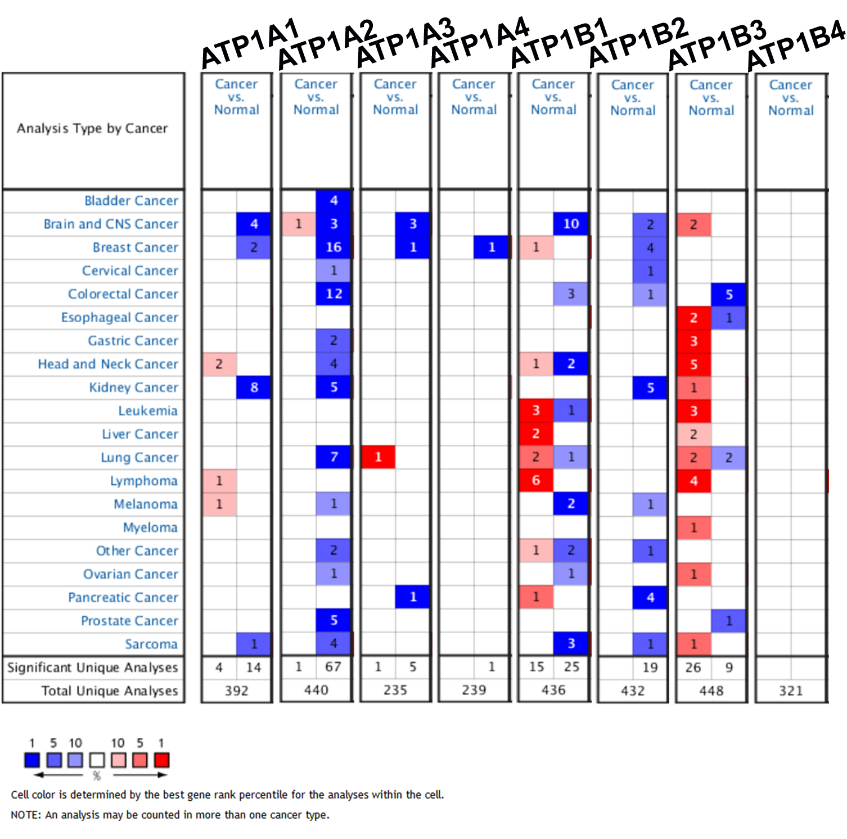


Fig S1. Using the ONCOMINE databases, a comparative analysis transcription levels of Na+/K+-ATPase genes was performed on cancer tissues and adjacent normal tissue.


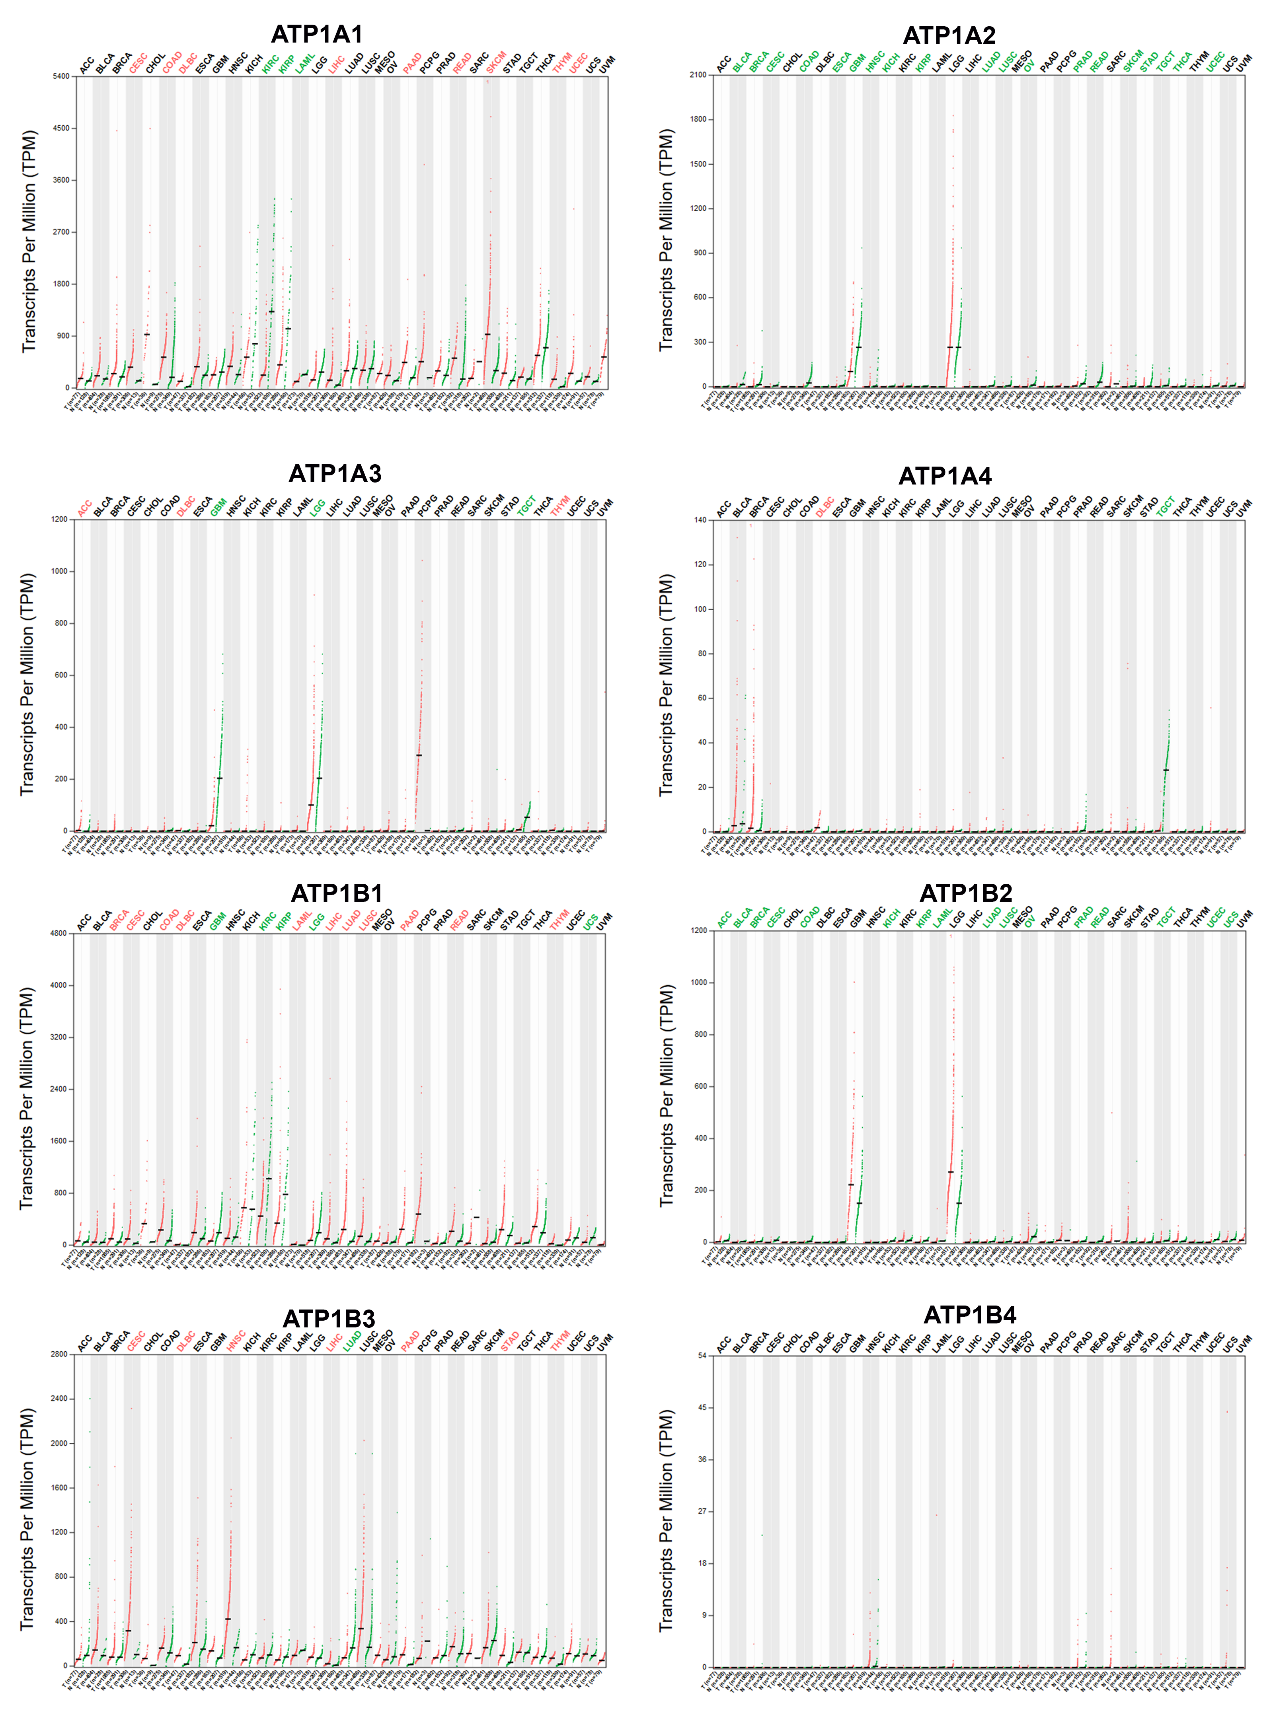


Fig S2. Using the GEPIA databases, a comparative analysis transcription levels of Na+/K+-ATPase genes was performed on cancer tissues and adjacent normal tissue.


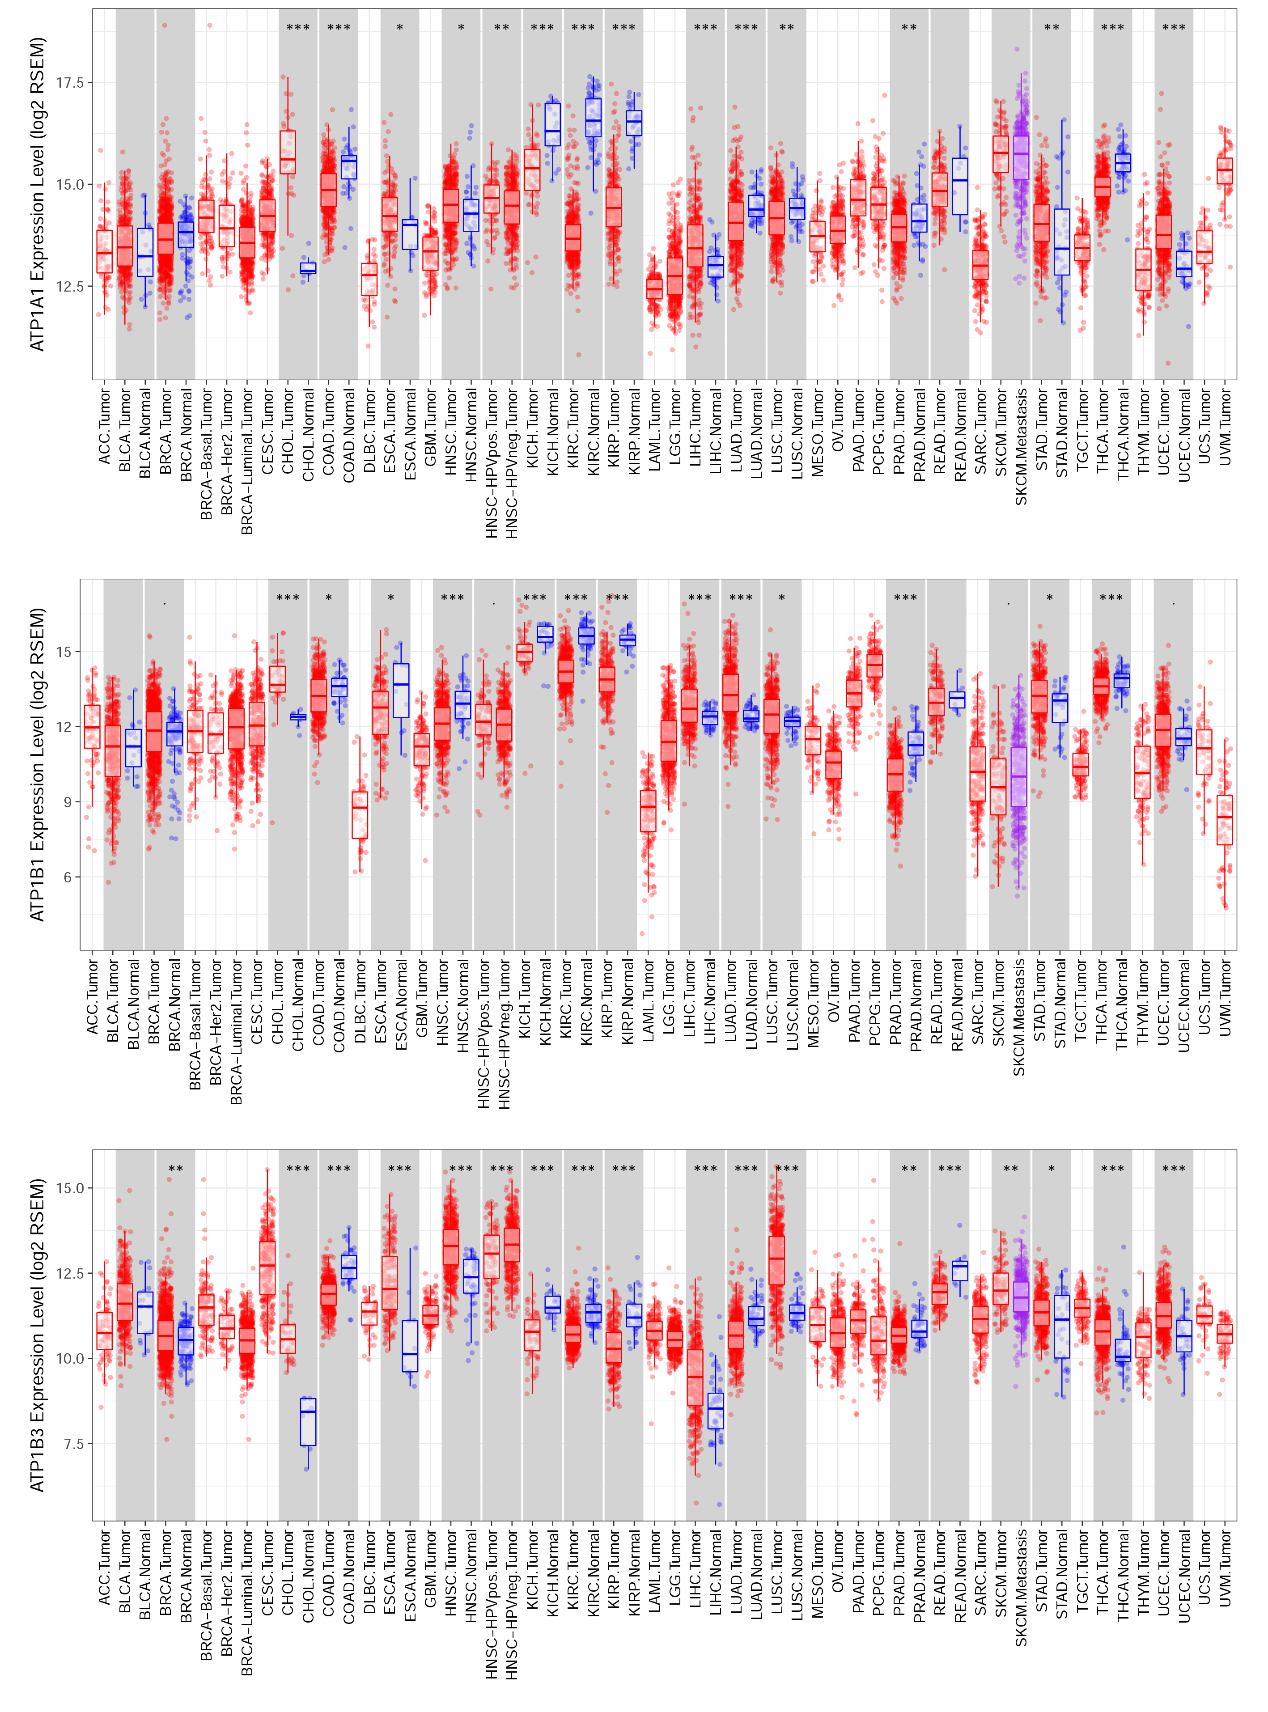


Fig S3. ATP1A1, ATP1B1 and ATP1B3 expression levels in different cancer types from TCGA data in TIMER. *P < 0.05, **P < 0.01, ***P < 0.001.


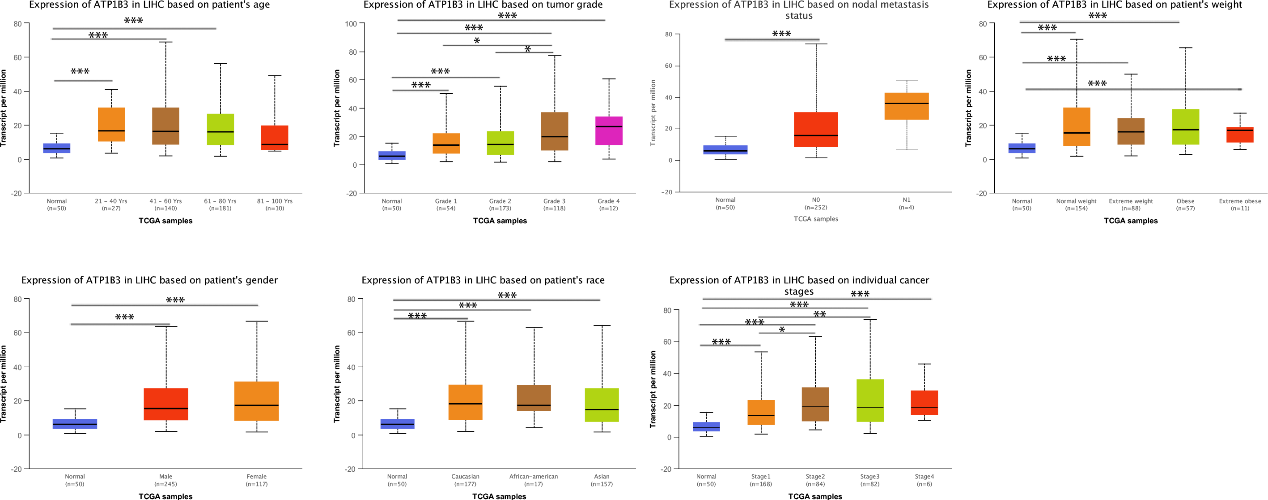


[Fig S4](https://www.ncbi.nlm.nih.gov/pmc/articles/PMC6977647/figure/f2/).ATP1B3expression in HCC **patients with different clinical feature using UALCAN.** The t-test was used to estimate the significance of difference in gene expression levels between groups. *, p < 0.05; **, p < 0.01; ***, p < 0.001.


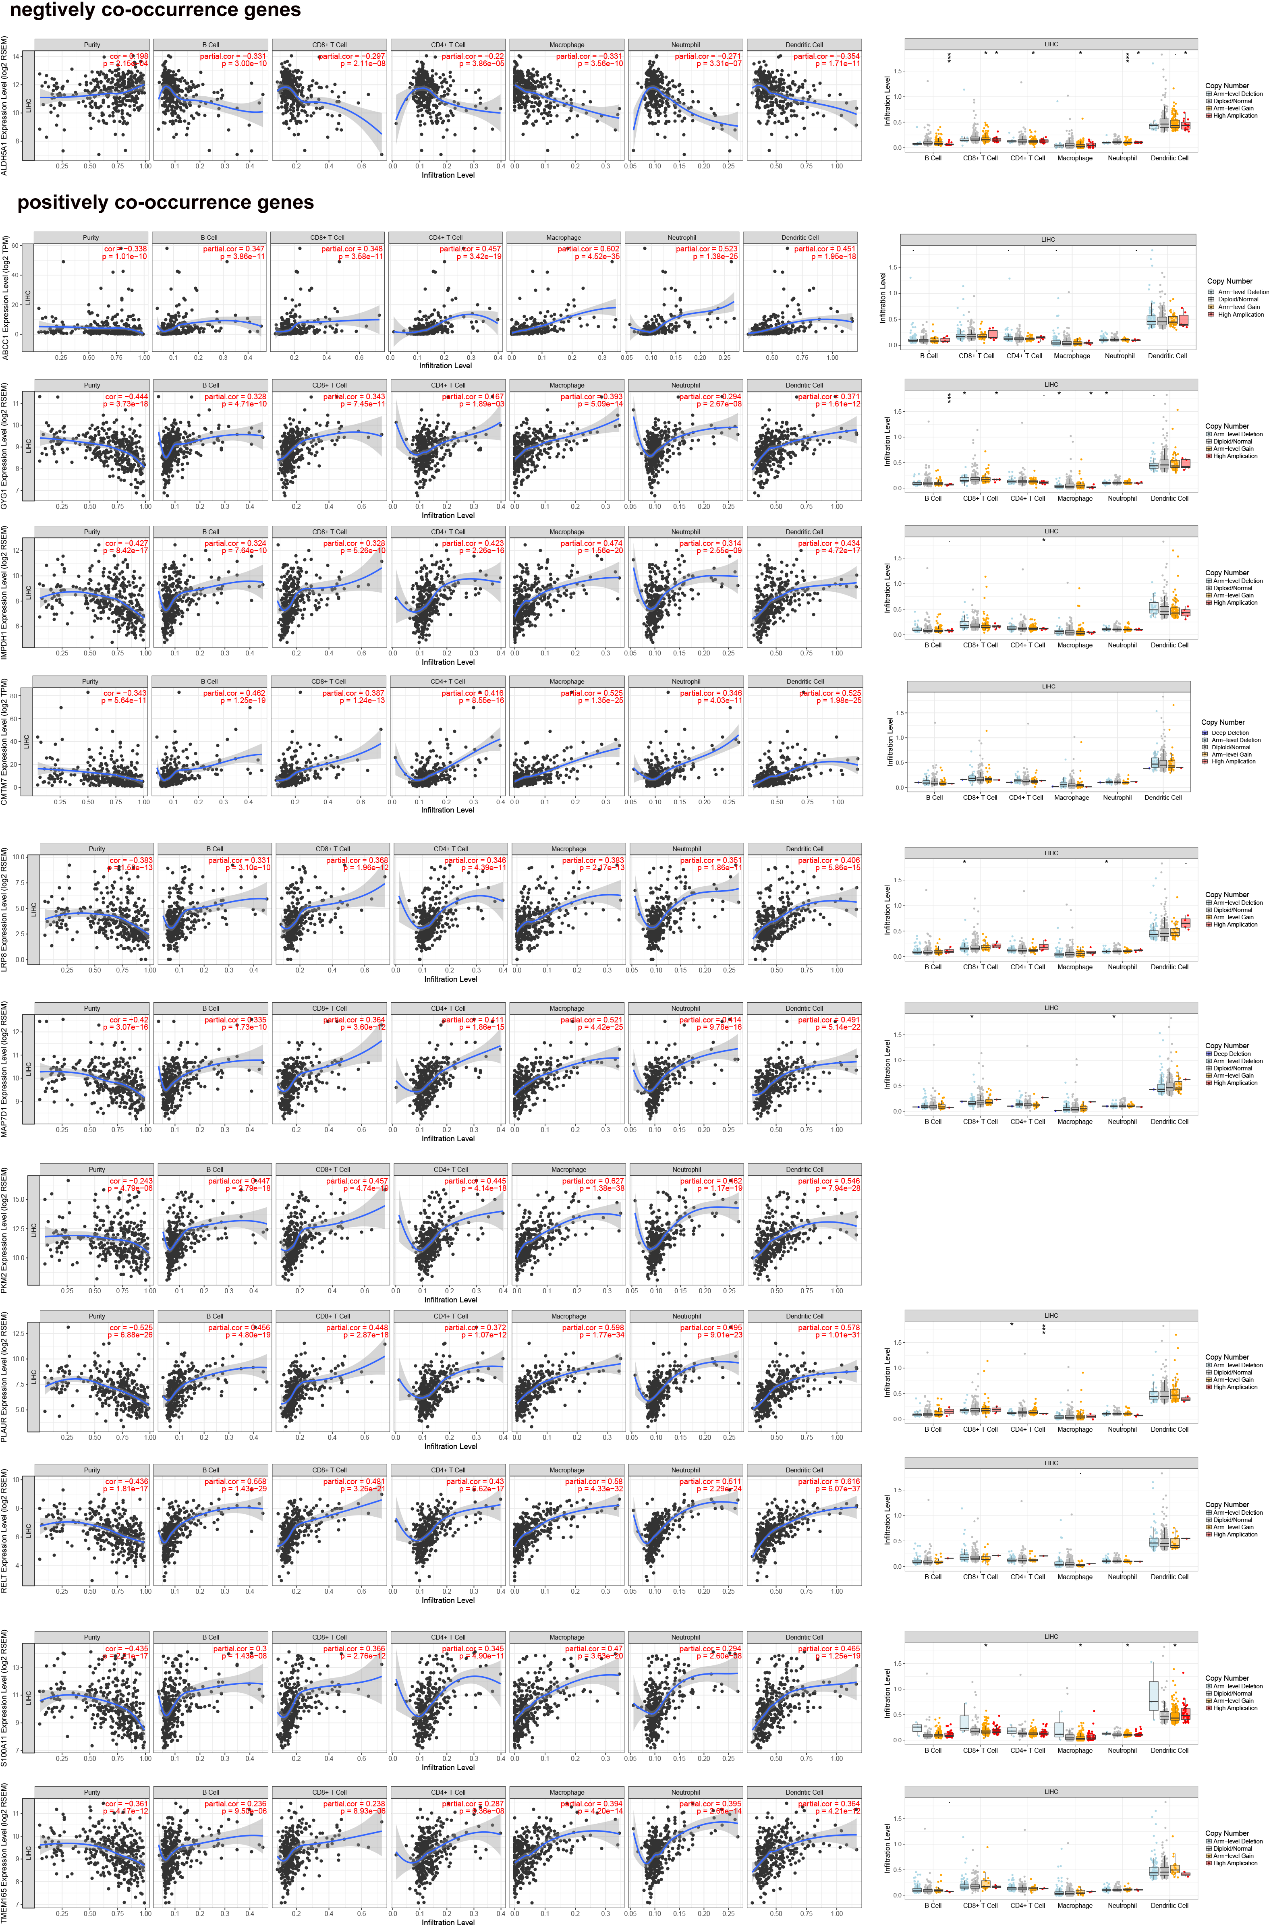


Fig S5. ATP1B3 co-expressed genes showed the significant correlations with tumor purity and varying degree with immune cells.


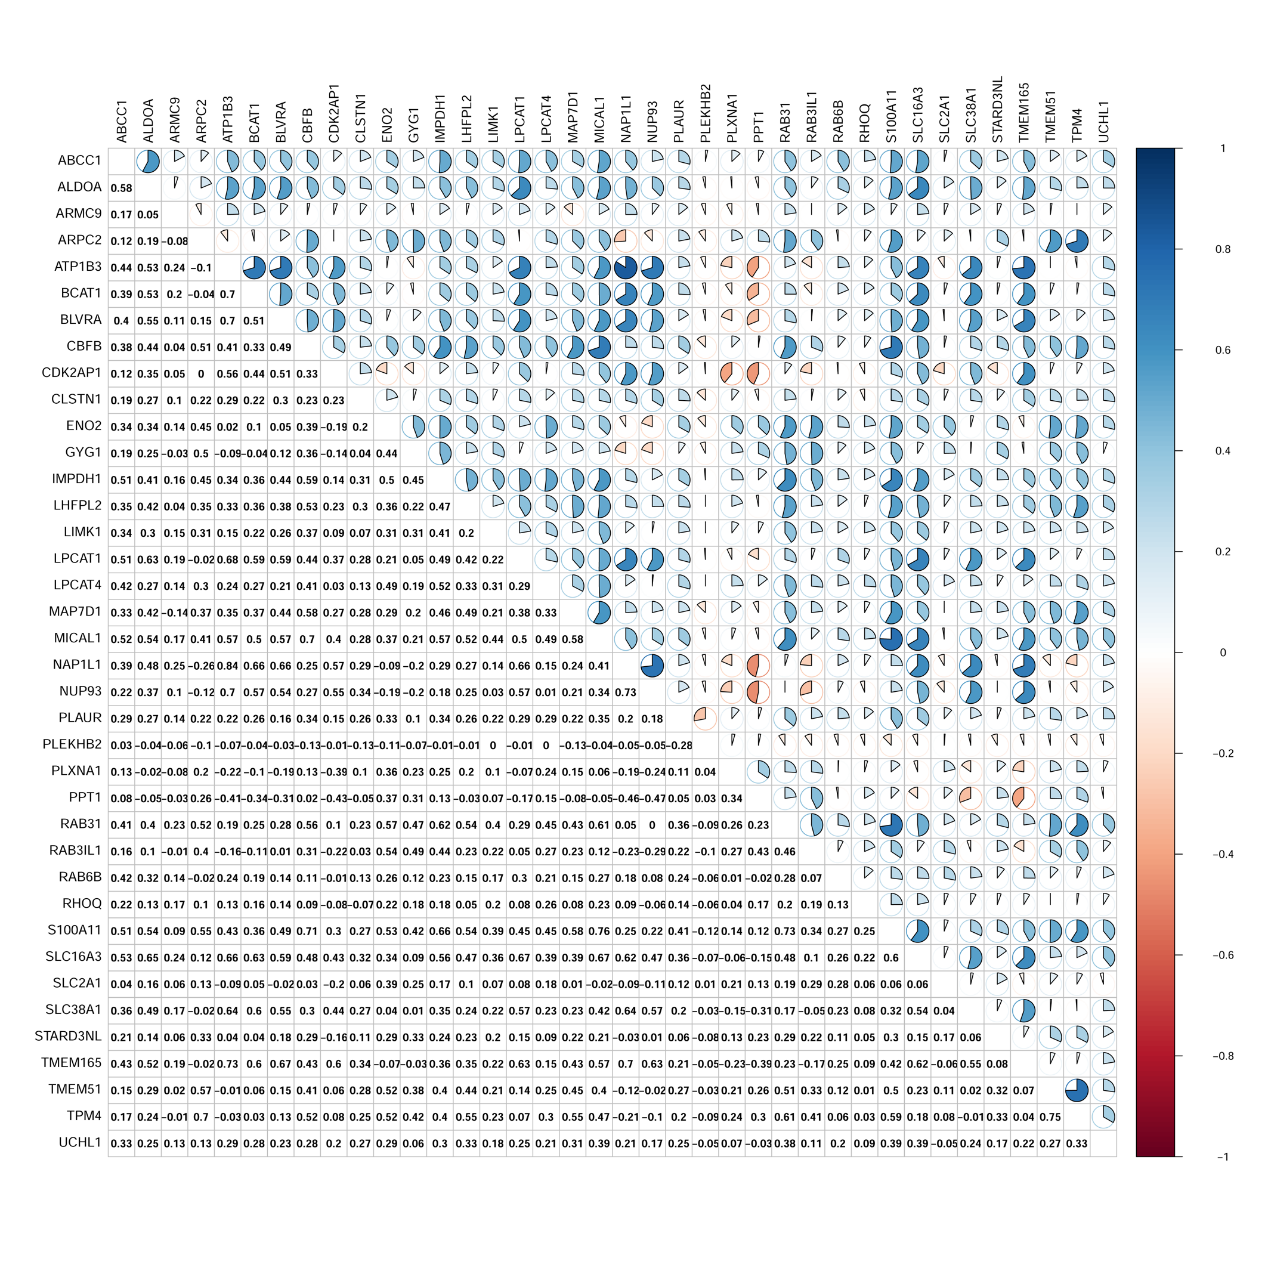


Fig S6. the relationship between ATP1B3 and 50 top positive co-expressed genes were confirmed using the CPTAC database.


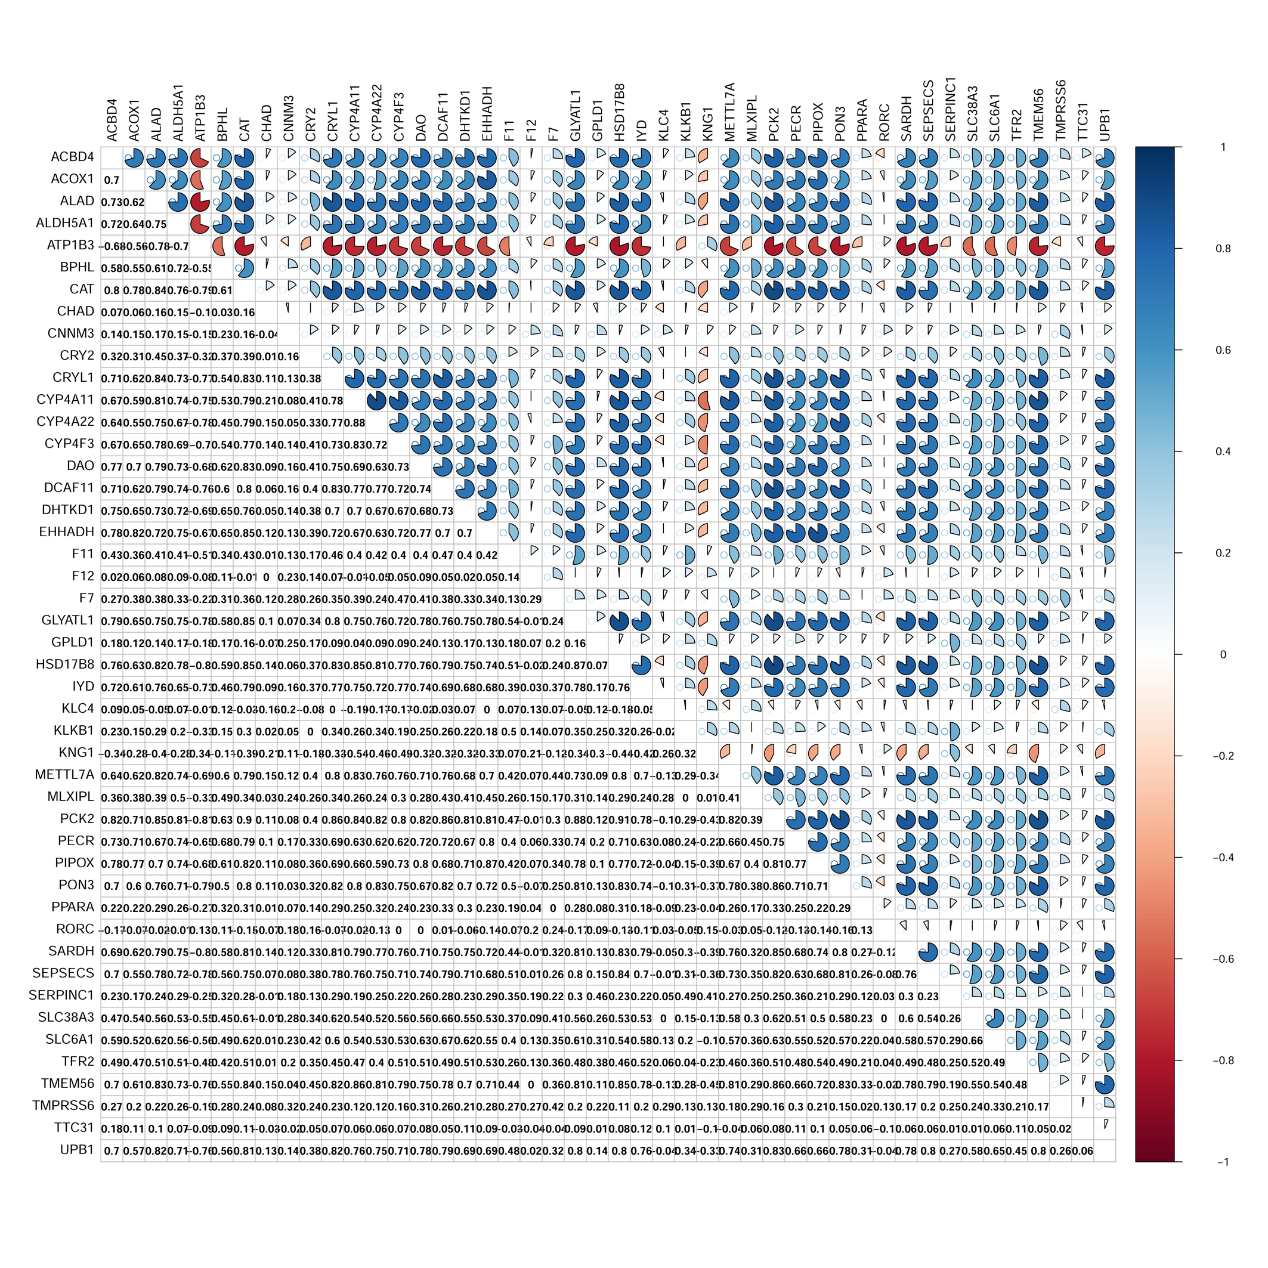


Fig S7. the relationship between ATP1B3 and 50 top negative co-expressed genes were confirmed using the CPTAC database.


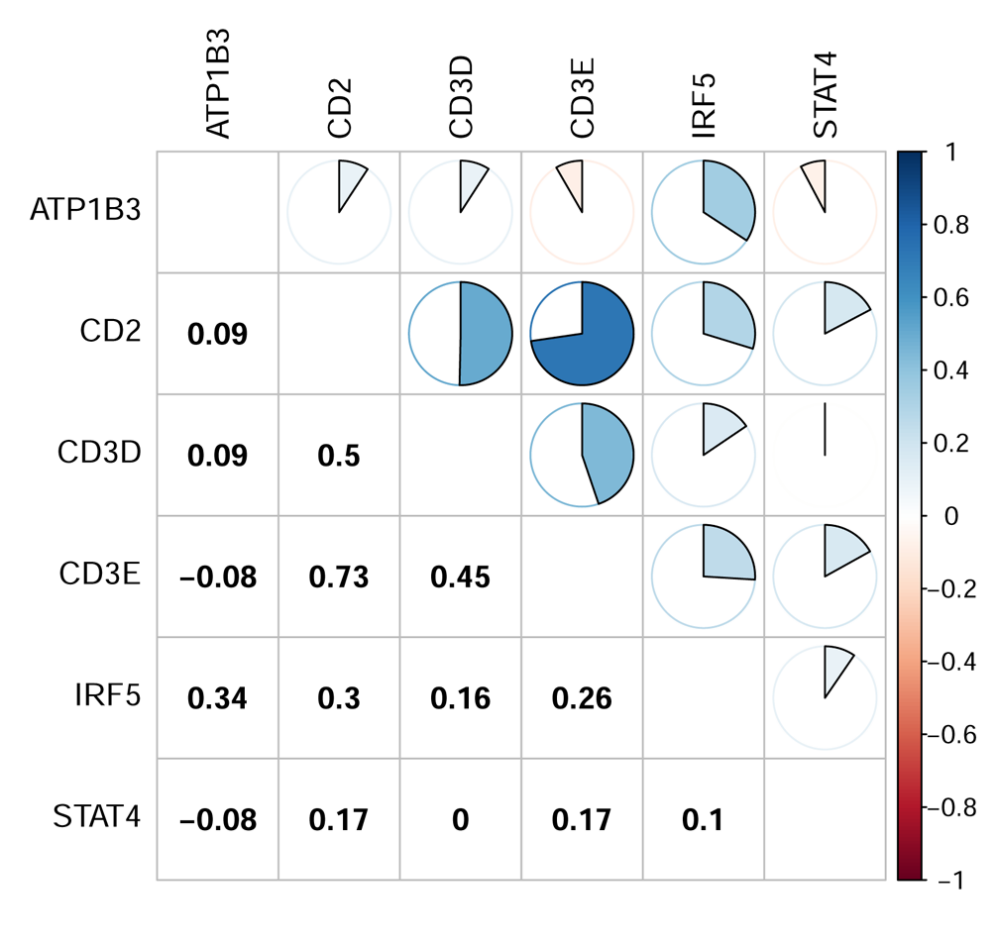


Fig S8. The correlation between ATP1B3 and immune gene were also confirmed using the CPTAC database.
